# Supplementary material for: Ectopic Expression of Hematopoietic SHIP1 in Human Colorectal Cancer
Source: MDPI journal article supplement (doi:10.3390/biomedicines8070215), 2020-07-15
Supplement: s1 [file s1]

## Supporting information

**Supplementary Table 1: Expression of SHIP1 in human solid tumors.** Tumor samples on a tissue microarray were stained against SHIP1 and scored into negative, weak, moderate or strong as described in the material and methods section. Only tumor entities with at least ten analyzable specimens are shown.

| Tumor type                                 | Immunostaining of SHIP1 in human solid tumor samples |                         |          |              |            |              |          |              |            |    |
|--------------------------------------------|------------------------------------------------------|-------------------------|----------|--------------|------------|--------------|----------|--------------|------------|----|
|                                            | n analyzable                                         | negative (n)            | weak (n) | moderate (n) | strong (n) | negative (%) | weak (%) | moderate (%) | strong (%) |    |
| <b>skin tumors</b>                         | basal cell adenoma                                   | 16                      | 12       | 4            | 0          | 0            | 75       | 25           | 0          | 0  |
|                                            | basalioma                                            | 23                      | 16       | 6            | 1          | 0            | 70       | 26           | 4          | 0  |
|                                            | malignant melanoma                                   | 15                      | 7        | 6            | 1          | 1            | 47       | 40           | 7          | 7  |
|                                            | pilomatrixoma                                        | 21                      | 5        | 13           | 3          | 0            | 24       | 62           | 14         | 0  |
| <b>respiratory tract tumors</b>            | skin cancer, SQCC                                    | 27                      | 21       | 4            | 2          | 0            | 78       | 15           | 7          | 0  |
|                                            | larynx, carcinoma                                    | 32                      | 24       | 6            | 2          | 0            | 75       | 19           | 6          | 0  |
|                                            | lung cancer, adenocarcinoma                          | 45                      | 27       | 15           | 3          | 0            | 60       | 33           | 7          | 0  |
|                                            | lung cancer, large cell cancer                       | 23                      | 13       | 9            | 1          | 0            | 57       | 39           | 4          | 0  |
|                                            | lung cancer, SQCC                                    | 34                      | 25       | 9            | 0          | 0            | 74       | 26           | 0          | 0  |
|                                            | mucoepidermoid carcinoma                             | 14                      | 6        | 4            | 3          | 1            | 43       | 29           | 21         | 7  |
|                                            | oral cavity, carcinoma                               | 29                      | 22       | 4            | 2          | 1            | 76       | 14           | 7          | 3  |
| <b>gynecological tumors</b>                | parotis, pleomorphic adenoma                         | 41                      | 33       | 8            | 0          | 0            | 80       | 20           | 0          | 0  |
|                                            | Warthin's tumor                                      | 37                      | 13       | 24           | 0          | 0            | 35       | 65           | 0          | 0  |
|                                            | breast cancer, apocrine carcinoma                    | 11                      | 8        | 3            | 0          | 0            | 73       | 27           | 0          | 0  |
|                                            | breast cancer, ductal carcinoma                      | 36                      | 32       | 4            | 0          | 0            | 89       | 11           | 0          | 0  |
|                                            | breast cancer, kribiform carcinoma                   | 15                      | 15       | 0            | 0          | 0            | 100      | 0            | 0          | 0  |
|                                            | breast cancer, lobular carcinoma                     | 34                      | 29       | 5            | 0          | 0            | 85       | 15           | 0          | 0  |
|                                            | breast cancer, medullary carcinoma                   | 45                      | 10       | 22           | 12         | 1            | 22       | 49           | 27         | 2  |
|                                            | breast cancer, mucinous carcinoma                    | 39                      | 32       | 6            | 1          | 0            | 82       | 15           | 3          | 0  |
|                                            | breast cancer, phylloid carcinoma                    | 15                      | 11       | 4            | 0          | 0            | 73       | 27           | 0          | 0  |
|                                            | breast cancer, tubulary carcinoma                    | 20                      | 16       | 4            | 0          | 0            | 80       | 20           | 0          | 0  |
|                                            | cervical cancer, adenocarcinoma                      | 26                      | 10       | 14           | 2          | 0            | 38       | 54           | 8          | 0  |
|                                            | cervical cancer, SQCC                                | 48                      | 2        | 39           | 5          | 2            | 4        | 81           | 10         | 4  |
|                                            | endometrial cancer, endometroid carcinoma            | 52                      | 26       | 23           | 3          | 0            | 50       | 44           | 6          | 0  |
|                                            | endometrial cancer, serous carcinoma                 | 35                      | 13       | 11           | 10         | 1            | 37       | 31           | 29         | 3  |
|                                            | ovarian cancer, Brenner tumor                        | 21                      | 7        | 14           | 0          | 0            | 33       | 67           | 0          | 0  |
|                                            | ovarian cancer, endometroid carcinoma                | 19                      | 8        | 10           | 1          | 0            | 42       | 53           | 5          | 0  |
|                                            | ovarian cancer, mucinous carcinoma                   | 30                      | 16       | 10           | 4          | 0            | 53       | 33           | 13         | 0  |
|                                            | ovarian cancer, serous carcinoma                     | 52                      | 11       | 24           | 17         | 0            | 21       | 46           | 33         | 0  |
|                                            | teratoma                                             | 14                      | 8        | 4            | 2          | 0            | 57       | 29           | 14         | 0  |
| <b>gastrointestinal tumors</b>             | vagina carcinoma, SQCC                               | 13                      | 6        | 5            | 2          | 0            | 46       | 38           | 15         | 0  |
|                                            | vulva carcinoma, SQCC                                | 38                      | 28       | 8            | 2          | 0            | 74       | 21           | 5          | 0  |
|                                            | colon adenoma, low grade                             | 11                      | 1        | 6            | 3          | 1            | 9        | 55           | 27         | 9  |
|                                            | colon adenoma, high grade                            | 14                      | 1        | 4            | 6          | 3            | 7        | 29           | 43         | 21 |
|                                            | colon cancer                                         | 35                      | 9        | 7            | 13         | 6            | 26       | 20           | 37         | 17 |
|                                            | esophageal carcinoma, adenocarcinoma                 | 46                      | 27       | 15           | 2          | 2            | 59       | 33           | 4          | 4  |
|                                            | esophageal carcinoma, SQCC                           | 40                      | 30       | 8            | 2          | 0            | 75       | 20           | 5          | 0  |
|                                            | gall bladder carcinoma                               | 21                      | 14       | 5            | 2          | 0            | 67       | 24           | 10         | 0  |
|                                            | gastrointestinal stroma tumor (GIST)                 | 31                      | 28       | 2            | 1          | 0            | 90       | 6            | 3          | 0  |
|                                            | hepatocellular carcinoma                             | 46                      | 41       | 5            | 0          | 0            | 89       | 11           | 0          | 0  |
|                                            | pancreatic cancer, ductal adenocarcinoma             | 31                      | 20       | 11           | 0          | 0            | 65       | 35           | 0          | 0  |
|                                            | pancreatic cancer, papilla, adeno                    | 13                      | 6        | 6            | 1          | 0            | 46       | 46           | 8          | 0  |
|                                            | small intestine carcinoma                            | 17                      | 7        | 4            | 3          | 3            | 41       | 24           | 18         | 18 |
|                                            | stomach cancer, diffuse type                         | 25                      | 8        | 10           | 3          | 4            | 32       | 40           | 12         | 16 |
|                                            | stomach cancer, intestinal type                      | 33                      | 12       | 15           | 4          | 2            | 36       | 45           | 12         | 6  |
|                                            | oncocyoma                                            | 43                      | 42       | 1            | 0          | 0            | 98       | 2            | 0          | 0  |
|                                            | <b>genitourinary tract tumors</b>                    | testis, non-seminoma    | 14       | 10           | 3          | 1            | 0        | 71           | 21         | 7  |
| testis, seminoma                           |                                                      | 60                      | 33       | 12           | 10         | 5            | 55       | 20           | 17         | 8  |
| penile carcinoma                           |                                                      | 21                      | 9        | 7            | 5          | 0            | 43       | 33           | 24         | 0  |
| prostate cancer                            |                                                      | 45                      | 43       | 1            | 1          | 0            | 96       | 2            | 2          | 0  |
| renal cell cancer, chromophobic            |                                                      | 36                      | 35       | 1            | 0          | 0            | 97       | 3            | 0          | 0  |
| renal cell cancer, clear cell              |                                                      | 44                      | 27       | 14           | 2          | 1            | 61       | 32           | 5          | 2  |
| renal cell cancer, papillary               |                                                      | 18                      | 11       | 7            | 0          | 0            | 61       | 39           | 0          | 0  |
| urinary bladder cancer, invasive (pT2-4)   |                                                      | 47                      | 13       | 20           | 14         | 0            | 28       | 43           | 30         | 0  |
| urinary bladder cancer, non-invasive (pTa) |                                                      | 51                      | 13       | 29           | 9          | 0            | 25       | 57           | 18         | 0  |
| <b>neuroendocrine tumors</b>               |                                                      | adrenal cortex, adenoma | 12       | 6            | 6          | 0            | 0        | 50           | 50         | 0  |
|                                            | carcinoid                                            | 19                      | 14       | 4            | 1          | 0            | 74       | 21           | 5          | 0  |
|                                            | paraganglioma                                        | 24                      | 16       | 7            | 1          | 0            | 67       | 29           | 4          | 0  |
|                                            | phaeochromocytoma                                    | 55                      | 35       | 19           | 1          | 0            | 64       | 35           | 2          | 0  |
|                                            | thyroid carcinoma, follicular                        | 39                      | 38       | 1            | 0          | 0            | 97       | 3            | 0          | 0  |
|                                            | thyroid carcinoma, medullary                         | 17                      | 11       | 3            | 3          | 0            | 65       | 18           | 18         | 0  |
|                                            | thyroid carcinoma, papillary                         | 36                      | 31       | 4            | 1          | 0            | 86       | 11           | 3          | 0  |
|                                            | thyroid, adenoma                                     | 43                      | 41       | 2            | 0          | 0            | 95       | 5            | 0          | 0  |
| <b>neuronal tumors</b>                     | astrocytoma                                          | 22                      | 11       | 6            | 5          | 0            | 50       | 27           | 23         | 0  |
|                                            | oligodendroglioma                                    | 17                      | 14       | 2            | 1          | 0            | 82       | 12           | 6          | 0  |
|                                            | neuroblastoma                                        | 35                      | 27       | 8            | 0          | 0            | 77       | 23           | 0          | 0  |
| <b>soft tissue tumors</b>                  | carcinosarcoma                                       | 25                      | 14       | 11           | 0          | 0            | 56       | 44           | 0          | 0  |
|                                            | giant cell tumor of the tendon sheat                 | 18                      | 5        | 10           | 3          | 0            | 28       | 56           | 17         | 0  |
|                                            | leiomyosarcoma                                       | 22                      | 15       | 7            | 0          | 0            | 68       | 32           | 0          | 0  |
|                                            | malignant fibrous histiocytoma                       | 17                      | 4        | 8            | 5          | 0            | 24       | 47           | 29         | 0  |
|                                            | malignant schwannoma                                 | 11                      | 8        | 3            | 0          | 0            | 73       | 27           | 0          | 0  |
|                                            | neurofibroma                                         | 15                      | 11       | 4            | 0          | 0            | 73       | 27           | 0          | 0  |

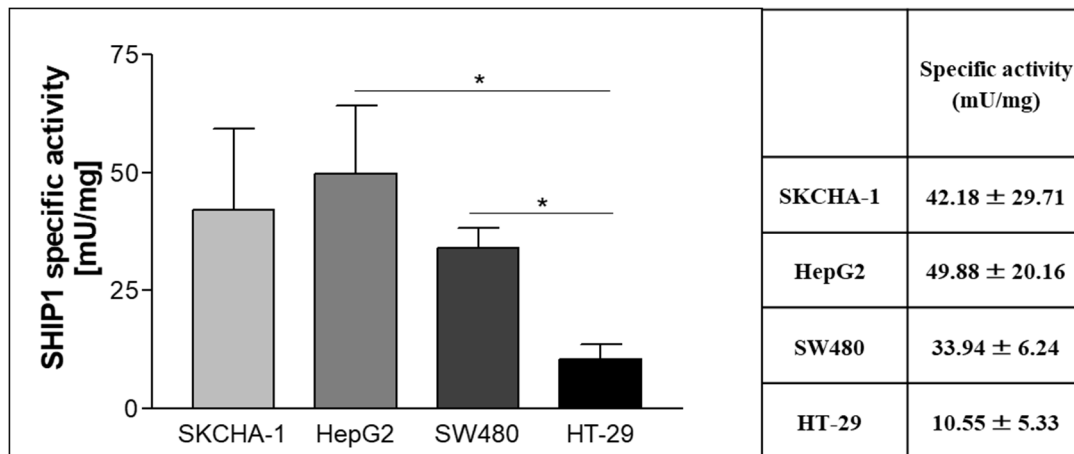

**Supplementary Figure 1: Phosphatase assay of carcinoma cell lines ectopically expressing SHIP1.** The enzymatic activity of SHIP1 expressed in selected carcinoma cell lines was assessed by a malachite green based inositol phosphatase assay using a shortened derivate of  $\text{PtdIns}(3,4,5)\text{P}_3$  (ci8- $\text{PtdIns}(3,4,5)\text{P}_3$ ) as a substrate. SHIP1 was isolated out of whole cell lysates by immunoprecipitation using SHIP1 specific antibody and the amount of SHIP1 in the assay was determined by Western Blot analysis using recombinant SHIP1 as a standard in order to calculate the specific activity. All measurements were done in threefold determination. Significances were calculated by unpaired Students t-test.

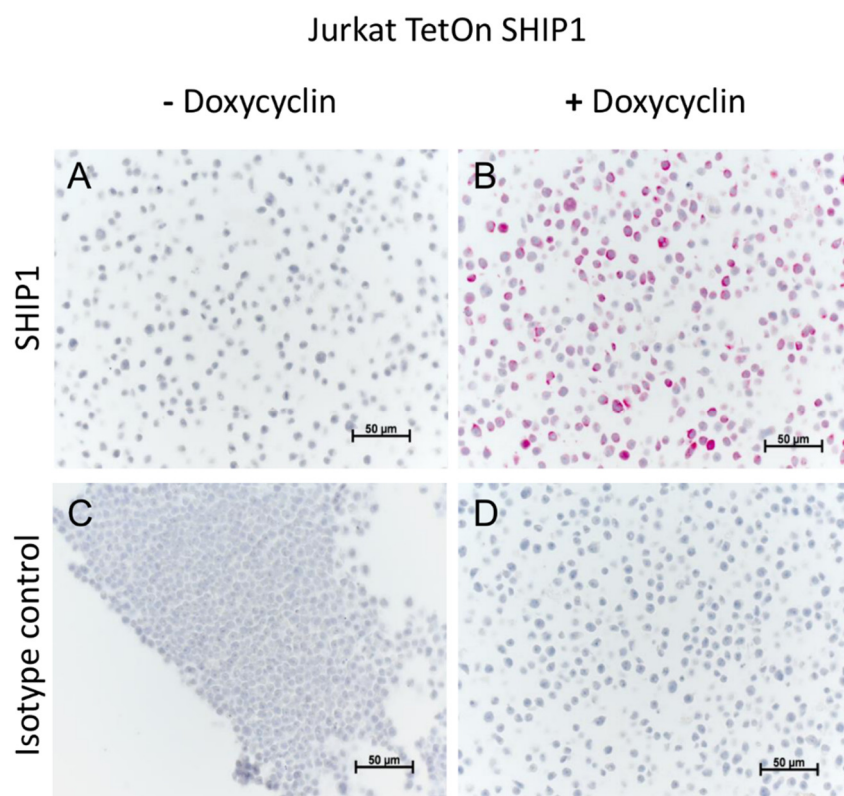

**Supplementary Figure 2: Validation of specificity of the anti-SHIP1 antibody.** Jurkat-TetOn cells, transduced with SHIP1 under the control of a doxycycline inducible promoter were either treated with doxycycline (1 $\mu\text{g}/\text{ml}$ ) or an equal volume of ethanol. Cells were stained either with the anti-SHIP1 antibody (a, b) or with an isotype control antibody (c, d).

a)

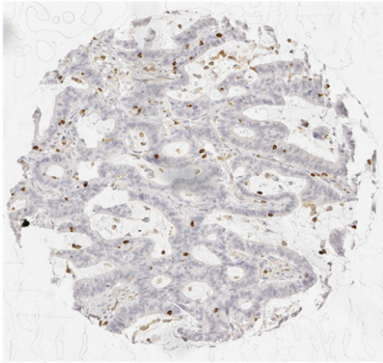

b)

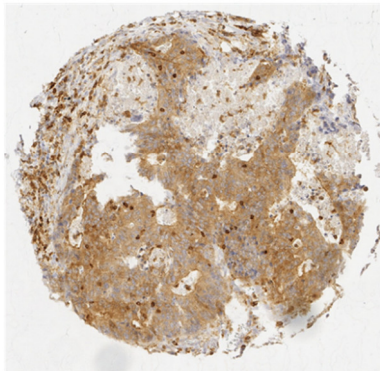

c)

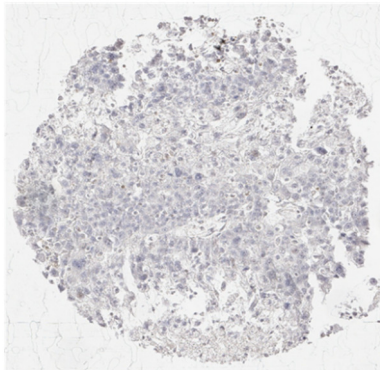

**Supplementary Figure 3: Validation of specificity of the immune histochemistry staining on tissue microarrays using anti-SHIP1 antibody.** a) A tissue microarray with colon tissue of a healthy person was stained with anti-SHIP1 antibody. Colon cells are negative, whereas immune cells show a strong SHIP-1 staining. b) A tissue microarray with colon cancer was stained with anti-SHIP1 antibody. SHIP-1 positive colon cancer cells and immune cells are detectable. c) Control staining of a tissue microarray with colon cancer was performed with an isotype control antibody. Neither cancer cells nor immune cells show detectable staining.

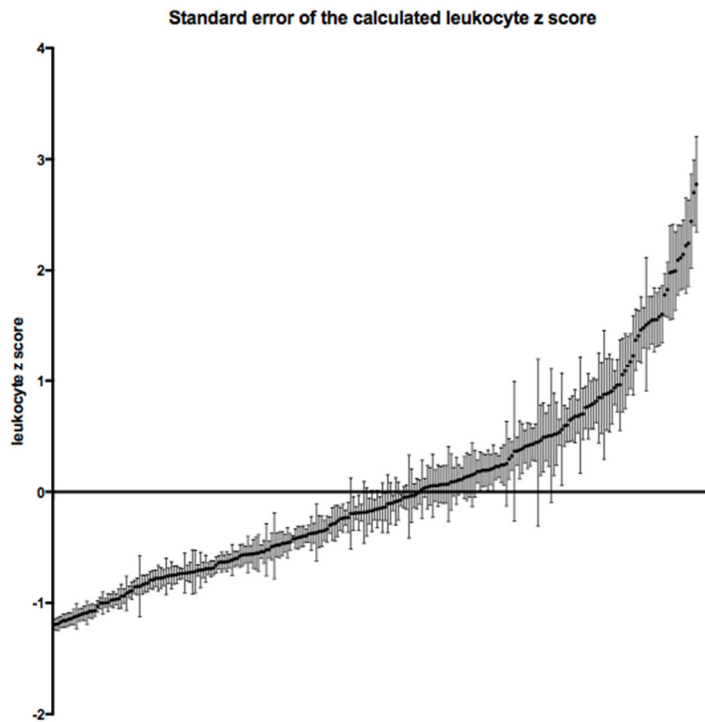

**Supplementary Figure 4: Standard error of the leukocyte z score.** For the colorectal cancer TCGA data, z score of leukocyte markers used (ITGB2, ITK, BTK, LST1, PTPRC, CD4 and CD48) was calculated and their level of concurrence was expressed by calculating the standard error of leukocyte markers for each sample, showing limited variability.
